# Supplementary material
Source: publisher site journal article supplement (https://www.dovepress.com/article/178056)
Supplement: Supplementary file 1 [file get_supplementary_file.php]

**Table S1.** Classification of IBD-related health services use. Note that description of IBD-related diagnoses in the text refer to all diagnostic codes classified as IBD-specific, IBD signs/symptoms and extra-intestinal manifestations.

| CONDITION                                                                                                                                                                                                                                                                                                                                                     | ICD-9          | OHIP diagnostic code | ICD-10                                             |
|---------------------------------------------------------------------------------------------------------------------------------------------------------------------------------------------------------------------------------------------------------------------------------------------------------------------------------------------------------------|----------------|----------------------|----------------------------------------------------|
| <b>IBD-SPECIFIC:</b>                                                                                                                                                                                                                                                                                                                                          |                |                      |                                                    |
| Crohn's                                                                                                                                                                                                                                                                                                                                                       | 555.x          | 555                  | K50.x                                              |
| UC                                                                                                                                                                                                                                                                                                                                                            | 556.x          | 556                  | K51.x                                              |
| <b>IBD SIGNS/SYMPTOMS:</b>                                                                                                                                                                                                                                                                                                                                    |                |                      |                                                    |
| Anorexia                                                                                                                                                                                                                                                                                                                                                      | 783.0          | 787                  | R63.0                                              |
| Abnormal Weight Gain                                                                                                                                                                                                                                                                                                                                          | 783.1          |                      | R63.5                                              |
| Abnormal Weight Loss                                                                                                                                                                                                                                                                                                                                          | 783.2          |                      | R63.4                                              |
| Underweight                                                                                                                                                                                                                                                                                                                                                   | 783.22         |                      | R62.8                                              |
| Failure to thrive, child                                                                                                                                                                                                                                                                                                                                      | 783.4          |                      | R62.8<br>R62.9                                     |
| Failure to thrive, adult                                                                                                                                                                                                                                                                                                                                      | 783.7          |                      | R62.8<br>R62.9                                     |
| Symptoms involving digestive system, including:<br>(787.0) Nausea and vomiting<br>(787.01) Nausea w/vomiting<br>(787.02) Nausea, alone<br>(787.03) Vomiting, alone<br>(787.1) Heartburn<br>(787.2) Dysphagia<br>(787.3) Gas/bloating<br>(787.6) Encopresis, fecal incontinence<br>(787.9) Other symptoms involving digestive system<br>(787.91) Diarrhea, NOS | 787.x          | 787                  | R11.x<br>R12.x<br>R13.x<br>R14.x<br>R15.x<br>R19.x |
| Abdominal pain                                                                                                                                                                                                                                                                                                                                                | 789.0          | 787                  | R10.x                                              |
| Dyspepsia                                                                                                                                                                                                                                                                                                                                                     | 536.8          | 536                  | K30.x                                              |
| Cachexia                                                                                                                                                                                                                                                                                                                                                      | 799.4          |                      | R64.x                                              |
| Esophagitis                                                                                                                                                                                                                                                                                                                                                   | 530.1          | 530                  | K20.x<br>K21.x                                     |
| Esophageal ulcer                                                                                                                                                                                                                                                                                                                                              | 530.2          |                      | K22.1                                              |
| Gastric ulcer                                                                                                                                                                                                                                                                                                                                                 | 531.x          | 531                  | K25.x                                              |
| Duodenal ulcer                                                                                                                                                                                                                                                                                                                                                | 532.x          | 532                  | K26.x                                              |
| Peptic ulcer                                                                                                                                                                                                                                                                                                                                                  | 533.x          |                      | K27.x                                              |
| GJ ulcer                                                                                                                                                                                                                                                                                                                                                      | 534.x          | 534                  | K28.x                                              |
| Gastritis/duodenitis                                                                                                                                                                                                                                                                                                                                          | 535.x          | 535                  | K29.x                                              |
| Intestinal obstruction                                                                                                                                                                                                                                                                                                                                        | 560.8<br>560.9 | 560                  | K31.5<br>K56.6                                     |
| Rectal/anal haemorrhage                                                                                                                                                                                                                                                                                                                                       | 569.3          | 569                  | K62.5                                              |
| Other disorder of rectum/anus, including:<br>(569.41) Ulcer                                                                                                                                                                                                                                                                                                   | 569.4          | 569                  | K62.6<br>K62.8                                     |

|                                                                                                                                                                                                                                                                                                                                                                                                                          |                                                             |     |                                                             |
|--------------------------------------------------------------------------------------------------------------------------------------------------------------------------------------------------------------------------------------------------------------------------------------------------------------------------------------------------------------------------------------------------------------------------|-------------------------------------------------------------|-----|-------------------------------------------------------------|
| (569.42) Pain<br>(569.43) Sphincter tear (healed)<br>(569.44) Dysplasia<br>(569.45) Other specified,<br>including proctitis,<br>inflammation                                                                                                                                                                                                                                                                             |                                                             |     |                                                             |
| Abscess of the intestine                                                                                                                                                                                                                                                                                                                                                                                                 | 569.5                                                       | 569 | K63.0                                                       |
| Other disorders of<br>intestine, including:<br>(569.81) Fistula (excl rectum)<br>(569.82) Ulcer of intestine<br>(569.83) Perforation<br>(569.84) Angiodysplasia, no<br>haemorrhage<br>(569.85) Angiodysplasia, with<br>haemorrhage<br>(569.86) Dieulafoy<br>(569.89) Other, including:<br>- Enteroptosis<br>- Granuloma of intestine<br>- Prolapse of intestine<br>- Pericolitis<br>- Perisigmoiditis<br>- Visceroptosis | 569.8                                                       | 569 | K63.2<br>K63.3<br>K63.1<br>K55.2<br>K63.8                   |
| Malabsorption                                                                                                                                                                                                                                                                                                                                                                                                            | 262.x<br>263.0<br>263.1<br>263.2<br>263.9<br>579.8<br>579.9 | 579 | E43.x<br>E44.0<br>E44.1<br>E45.x<br>E46.x<br>K90.8<br>K90.9 |
| <b>EXTRA-INTESTINAL<br/>MANIFESTATIONS:</b>                                                                                                                                                                                                                                                                                                                                                                              |                                                             |     |                                                             |
| Anal Fistula                                                                                                                                                                                                                                                                                                                                                                                                             | 565.1                                                       | 565 | K60.3                                                       |
| Anal Abscess                                                                                                                                                                                                                                                                                                                                                                                                             | 566.x                                                       | 566 | K61.0<br>K61.1<br>K61.2<br>K61.3<br>K61.4                   |
| Ureteral Fistula                                                                                                                                                                                                                                                                                                                                                                                                         | 593.8                                                       |     | N28.81<br>N28.88                                            |
| Urethral Fistula                                                                                                                                                                                                                                                                                                                                                                                                         | 599.1                                                       |     | N36.0                                                       |
| Fistula of stomach &<br>duodenum                                                                                                                                                                                                                                                                                                                                                                                         | 537.4                                                       |     | K31.6                                                       |
| Vesical fistula                                                                                                                                                                                                                                                                                                                                                                                                          | 596.2                                                       |     | N32.2                                                       |
| Fistula involving female<br>GU                                                                                                                                                                                                                                                                                                                                                                                           | 619.x                                                       |     | N82.x                                                       |
| Haemorrhoids, including:<br>(455.9) Anal skin tags                                                                                                                                                                                                                                                                                                                                                                       | 455.x                                                       | 455 | I84.x                                                       |
| Rheumatoid arthritis                                                                                                                                                                                                                                                                                                                                                                                                     | 713.1                                                       | 714 | M050                                                        |

|                                                                                                                                                                                                           |                                                             |     |                                                                                                                                                                                                      |
|-----------------------------------------------------------------------------------------------------------------------------------------------------------------------------------------------------------|-------------------------------------------------------------|-----|------------------------------------------------------------------------------------------------------------------------------------------------------------------------------------------------------|
|                                                                                                                                                                                                           | 714.x<br>716.4<br>716.5<br>716.6<br>716.7<br>716.8<br>716.9 |     | M052<br>M053<br>M058<br>M059<br>M060<br>M061<br>M062<br>M064<br>M068<br>M069<br>M070<br>M080<br>M081<br>M082<br>M083<br>M084<br>M088<br>M089<br>M090<br>M091<br>M092<br>M098<br>M130<br>M131<br>M139 |
| Arthropathy associated with GI cause                                                                                                                                                                      | 713.3                                                       |     | M074<br>M075<br>M076                                                                                                                                                                                 |
| Inflammatory spondylopathies, including:<br>(720.0) Ankylosing spondylitis<br>(720.1) Spinal enthesopathy<br>(720.2) Sacroiliitis<br>(720.8) Other inflammatory<br>(720.9) Other unspecified inflammatory | 720.x                                                       | 720 | M45.x<br>M46.x                                                                                                                                                                                       |
| Scleritis & episcleritis                                                                                                                                                                                  | 379.x                                                       | 379 | H15.x                                                                                                                                                                                                |
| Unspecified iridocyclitis (uveitis NOS)                                                                                                                                                                   | 364.3                                                       | 364 | H20.9                                                                                                                                                                                                |
| Chorioretinitis, unspecified (unveitis, posterior NOS)                                                                                                                                                    | 363.2                                                       | 363 | H30.9                                                                                                                                                                                                |
| Acute and subacute iridocyclitis                                                                                                                                                                          | 364.0                                                       | 364 | H20.0                                                                                                                                                                                                |
| Erythema nodosum                                                                                                                                                                                          | 695.2                                                       | 695 | L52                                                                                                                                                                                                  |
| Pyoderma                                                                                                                                                                                                  | 686.0                                                       | 686 | L08.0                                                                                                                                                                                                |
| Pyogenic granuloma of the skin and soft tissue                                                                                                                                                            | 686.1                                                       | 686 | L98.0                                                                                                                                                                                                |
| Oral aphthae                                                                                                                                                                                              | 528.2                                                       | 528 | K12.0                                                                                                                                                                                                |

|                                   |                         |     |                                  |
|-----------------------------------|-------------------------|-----|----------------------------------|
| Short stature                     | 783.4                   |     | E34.3                            |
| Osteoporosis                      | 733.0<br>733.1          | 733 | M80.x<br>M81.x<br>M82.x<br>M83.x |
| Osteomyelitis                     | 730.0<br>730.1<br>730.2 | 730 | M86.x                            |
| Acute glomerulonephritis          | 580.x                   | 580 | N00.x                            |
| Nephrolithiasis                   | 592.x                   | 592 | N20.x                            |
| Primary Sclerosing<br>Cholangitis | 576.1                   | 576 | K83.0                            |
| Venous<br>embolism/thrombosis     | 453.x                   |     | I82.x                            |

**Table S2.** Codes use to identify surgical resections (for Crohn’s disease) and colectomies (for ulcerative colitis) in Discharge Abstract Data from the Canadian Institute for Health Information (CIHI-DAD) .

**(a) CCI Intervention Coding – by Surgical Indication**

| <b>Resective Surgery</b>                                                                                                                                                                             |                                                                                                                                                                                                                                                                                                                                                                                                                                                                                                                                                                              |
|------------------------------------------------------------------------------------------------------------------------------------------------------------------------------------------------------|------------------------------------------------------------------------------------------------------------------------------------------------------------------------------------------------------------------------------------------------------------------------------------------------------------------------------------------------------------------------------------------------------------------------------------------------------------------------------------------------------------------------------------------------------------------------------|
| <b>1.NK.87</b><br>1.NK.87.BA<br>1.NK.87.DA<br>1.NK.87.LA<br>1.NK.87.DN<br>1.NK.87.RE<br>1.NK.87.DP<br>1.NK.87.RF<br>1.NK.87.DX<br>1.NK.87.TF<br>1.NK.87.DY<br>1.NK.87.TG                             | <b>Excision partial, small intestine</b><br>Simple excision, per orifice<br>Simple excision, laparoscopic<br>Simple excision, open<br>Enterocolostomy anastomosis, laparoscopic<br>Enterocolostomy anastomosis, open<br>Enteroenterostomy anastomosis, laparoscopic<br>Enteroenterostomy anastomosis, open<br>Stoma formation with distal closure, laparoscopic<br>Stoma formation with distal closure, open<br>Stoma formation with mucous fistula, laparoscopic<br>Stoma formation with mucous fistula,, open                                                              |
| <b>1.NM.87</b><br>1.NM.87.BA<br>1.NM.87.DA<br>1.NM.87.LA<br>1.NM.87.DF<br>1.NM.87.RN<br>1.NM.87.DE<br>1.NM.87.RD<br>1.NM.87.DN<br>1.NM.87.RE<br>1.NM.87.DX<br>1.NM.87.TF<br>1.NM.87.DY<br>1.NM.87.TG | <b>Excision partial, large intestine</b><br>Simple excision, per orifice<br>Simple excision, laparoscopic<br>Simple excision, open<br>Colocolostomy anastomosis, laparoscopic<br>Colocolostomy anastomosis, open<br>Colorectal anastomosis, laparoscopic<br>Colorectal anastomosis, open<br>Enterocolostomy anastomosis, laparoscopic<br>Enterocolostomy anastomosis, open<br>Stoma formation and distal closure, laparoscopic<br>Stoma formation and distal closure, open<br>Stoma formation with mucous fistula, laparoscopic<br>Stoma formation with mucous fistula, open |
| <b>1.NM.89</b><br>1.NM.89.DF<br>1.NM.89.RN<br>1.NM.89.DX<br>1.NM.89.TF                                                                                                                               | <b>Excision total, large intestine</b><br>Ileorectal anastomosis, laparoscopic<br>Ileorectal anastomosis, open<br>Stoma formation with distal closure, laparoscopic<br>Stoma formation with distal closure, open                                                                                                                                                                                                                                                                                                                                                             |
| <b>1.NM.91</b><br>1.NM.91.DF<br>1.NM.91.RN<br>1.NM.91.DE<br>1.NM.91.RD<br>1.NM.91.DN<br>1.NM.91.RE<br>1.NM.91.DX<br>1.NM.91.TF                                                                       | <b>Excision radical, large intestine (including en bloc resection)</b><br>Colocolostomy anastomosis, laparoscopic<br>Colocolostomy anastomosis, open<br>Colorectal anastomosis, laparoscopic<br>Colorectal anastomosis, open<br>Enterocolostomy anastomosis, laparoscopic<br>Enterocolostomy anastomosis, open<br>Stoma formation with distal closure, laparoscopic<br>Stoma formation with distal closure, open                                                                                                                                                             |

|                          |                                                                                                |
|--------------------------|------------------------------------------------------------------------------------------------|
| 1.NM.91.DY<br>1.NM.91.TG | Stoma formation with mucous fistula, laparoscopic<br>Stoma formation with mucous fistula, open |
| <b>1.NP.58.LAXXK</b>     | <b>Procurement, small and large intestine</b>                                                  |
| <b>1.OW.89</b>           | <b>Excision total, surgically constructed sites in digestive &amp; biliary tract</b>           |
| 1.OW.89.DA<br>1.OW.89.LA | Excision total, laparoscopic<br>Excision total, open                                           |

(b) CCP Intervention Coding – by Surgical Indication

| <b>RESECTION/COLECTOMY FOR CROHN'S</b>                | <b>COLECTOMY FOR ULCERATIVE COLITIS</b>               |
|-------------------------------------------------------|-------------------------------------------------------|
| 5741- multiple segmental resection of small intestine |                                                       |
| 5742- Other partial resection of small intestine      |                                                       |
| 5743- Total removal of small intestine                |                                                       |
| 575- partial excision of large intestine              | 575- partial excision of large intestine              |
| 5751- multiple segmental resection of large intestine | 5751- multiple segmental resection of large intestine |
| 5753-right hemicolectomy                              | 5753-right hemicolectomy                              |
| 5755-left hemicolectomy                               | 5755-left hemicolectomy                               |
| 576-total colectomy                                   | 576-total colectomy                                   |
| 5752- cecectomy                                       | 5752- cecectomy                                       |
| 5754- resection of transverse colon                   | 5754- resection of transverse colon                   |
| 5756- sigmoidectomy                                   | 5756- sigmoidectomy                                   |
| 5759- other partial excision of large intestine       | 5759- other partial excision of large intestine       |
